# Supplementary material for: Dynamics of Triatoma infestans populations in the Paraguayan Chaco: Population genetic analysis of household reinfestation following vector control
Source: PLoS One. 2022 Feb 10;17(2):e0263465. doi: 10.1371/journal.pone.0263465 (PMC8830694; doi:10.1371/journal.pone.0263465)
Supplement: S2 File — (XLSX) [file pone.0263465.s002.xlsx]

## Sheet: Supplementary File S2
S2 File. Cytochrome B sequences used for phylogeographic network analysis.
Country of Origin	Study Area	Group	Sequence ID	GenBank Accession #	Reference
Argentina	Moreno Department, Province of Santiago del Estero	Non-Andean	XXXVII	JN006794	Ceballos LA, Piccinali RV, Marcet PL, Vazquez-Prokopec GM, Cardinal MV, Schachter-Broide J et al. (2011). Hidden sylvatic foci of the main vector of Chagas disease Triatoma infestans: threats to the vector elimination campaigns? PLoS Negl Trop Dis, 5(10):e1365.
Argentina	Moreno Department, Province of Santiago del Estero	Non-Andean	XXXVI	JN006793	Ceballos LA, Piccinali RV, Marcet PL, Vazquez-Prokopec GM, Cardinal MV, Schachter-Broide J et al. (2011). Hidden sylvatic foci of the main vector of Chagas disease Triatoma infestans: threats to the vector elimination campaigns? PLoS Negl Trop Dis, 5(10):e1365.
Argentina	Moreno Department, Province of Santiago del Estero	Non-Andean	V	JN006796	Ceballos LA, Piccinali RV, Marcet PL, Vazquez-Prokopec GM, Cardinal MV, Schachter-Broide J et al. (2011). Hidden sylvatic foci of the main vector of Chagas disease Triatoma infestans: threats to the vector elimination campaigns? PLoS Negl Trop Dis, 5(10):e1365.
Argentina	Moreno Department, Province of Santiago del Estero	Non-Andean	VIII	JN006795	Ceballos LA, Piccinali RV, Marcet PL, Vazquez-Prokopec GM, Cardinal MV, Schachter-Broide J et al. (2011). Hidden sylvatic foci of the main vector of Chagas disease Triatoma infestans: threats to the vector elimination campaigns? PLoS Negl Trop Dis, 5(10):e1365.
Argentina	Moreno Department, Province of Santiago del Estero	Non-Andean	XIV	JN006799	Ceballos LA, Piccinali RV, Marcet PL, Vazquez-Prokopec GM, Cardinal MV, Schachter-Broide J et al. (2011). Hidden sylvatic foci of the main vector of Chagas disease Triatoma infestans: threats to the vector elimination campaigns? PLoS Negl Trop Dis, 5(10):e1365.
Argentina	Moreno Department, Province of Santiago del Estero	Non-Andean	II	JN006797	Ceballos LA, Piccinali RV, Marcet PL, Vazquez-Prokopec GM, Cardinal MV, Schachter-Broide J et al. (2011). Hidden sylvatic foci of the main vector of Chagas disease Triatoma infestans: threats to the vector elimination campaigns? PLoS Negl Trop Dis, 5(10):e1365.
Argentina	Moreno Department, Province of Santiago del Estero	Non-Andean	VII	JN006798	Ceballos LA, Piccinali RV, Marcet PL, Vazquez-Prokopec GM, Cardinal MV, Schachter-Broide J et al. (2011). Hidden sylvatic foci of the main vector of Chagas disease Triatoma infestans: threats to the vector elimination campaigns? PLoS Negl Trop Dis, 5(10):e1365.
Bolivia	Cochabamba/Potosi Departments	Andean	I	AY062165/EF639038	Marcet PL, Santo-Orihuela P, Messenger LA, Vassena CV. Genetic structure and sodium channel gene mutation analysis related to pyrethroid insecticide toxicity in sylvatic Andean Triatoma infestans from Bolivia. bioRxiv 512392; doi: https://doi.org/10.1101/
Bolivia	Cochabamba/Potosi Departments	Andean	XXIV	MH763648	Marcet PL, Santo-Orihuela P, Messenger LA, Vassena CV. Genetic structure and sodium channel gene mutation analysis related to pyrethroid insecticide toxicity in sylvatic Andean Triatoma infestans from Bolivia. bioRxiv 512392; doi: https://doi.org/10.1101/
Bolivia	Cochabamba/Potosi Departments	Andean	XVI	MH763649	Marcet PL, Santo-Orihuela P, Messenger LA, Vassena CV. Genetic structure and sodium channel gene mutation analysis related to pyrethroid insecticide toxicity in sylvatic Andean Triatoma infestans from Bolivia. bioRxiv 512392; doi: https://doi.org/10.1101/
Bolivia	Cochabamba/Potosi Departments	Andean	XLIX	MH763650	Marcet PL, Santo-Orihuela P, Messenger LA, Vassena CV. Genetic structure and sodium channel gene mutation analysis related to pyrethroid insecticide toxicity in sylvatic Andean Triatoma infestans from Bolivia. bioRxiv 512392; doi: https://doi.org/10.1101/
Bolivia	Cochabamba/Potosi Departments	Andean	XXVII	MH763651	Marcet PL, Santo-Orihuela P, Messenger LA, Vassena CV. Genetic structure and sodium channel gene mutation analysis related to pyrethroid insecticide toxicity in sylvatic Andean Triatoma infestans from Bolivia. bioRxiv 512392; doi: https://doi.org/10.1101/
Bolivia	Cochabamba/Potosi Departments	Andean	XLV	MH763652	Marcet PL, Santo-Orihuela P, Messenger LA, Vassena CV. Genetic structure and sodium channel gene mutation analysis related to pyrethroid insecticide toxicity in sylvatic Andean Triatoma infestans from Bolivia. bioRxiv 512392; doi: https://doi.org/10.1101/
Bolivia	Cochabamba/Potosi Departments	Andean	XLVI	MH763653	Marcet PL, Santo-Orihuela P, Messenger LA, Vassena CV. Genetic structure and sodium channel gene mutation analysis related to pyrethroid insecticide toxicity in sylvatic Andean Triatoma infestans from Bolivia. bioRxiv 512392; doi: https://doi.org/10.1101/
Bolivia	Cochabamba/Potosi Departments	Andean	XLVII	MH763654	Marcet PL, Santo-Orihuela P, Messenger LA, Vassena CV. Genetic structure and sodium channel gene mutation analysis related to pyrethroid insecticide toxicity in sylvatic Andean Triatoma infestans from Bolivia. bioRxiv 512392; doi: https://doi.org/10.1101/
Bolivia	Santa Cruz Department	Non-Andean	TAMIV671	MN504845	Barnabe C, Grijalva MJ, Santillan-Guayasamin S, Yumiseva CA, Waleckx E, Breniere SF, Villacis AG. (2020). Genetic data support speciation between Panstrongylus howardi and Panstrongylus chinai, vectors of Chagas disease in Ecuador. Infect Genet Evol, 78:104103.
Bolivia	Santa Cruz Department	Non-Andean	TAMVI6713	MN504844	Barnabe C, Grijalva MJ, Santillan-Guayasamin S, Yumiseva CA, Waleckx E, Breniere SF, Villacis AG. (2020). Genetic data support speciation between Panstrongylus howardi and Panstrongylus chinai, vectors of Chagas disease in Ecuador. Infect Genet Evol, 78:104103.
Bolivia	Chuquisaca Department	Andean	Haplotype A	AY702018	Giordano R, Pizarro JC, Paulk S, Stevens L. (2005).Genetic diversity of Triatoma infestans (Hemiptera: Reduviidae) in Chuquisaca, Bolivia based on the mitochondrial cytochrome b gene. Mem Inst Oswaldo Cruz, 100(7):753-760
Bolivia	Chuquisaca Department	Andean	Haplotype B	AY702019	Giordano R, Pizarro JC, Paulk S, Stevens L. (2005).Genetic diversity of Triatoma infestans (Hemiptera: Reduviidae) in Chuquisaca, Bolivia based on the mitochondrial cytochrome b gene. Mem Inst Oswaldo Cruz, 100(7):753-760
Bolivia	Chuquisaca Department	Andean	Haplotype C	AY702020	Giordano R, Pizarro JC, Paulk S, Stevens L. (2005).Genetic diversity of Triatoma infestans (Hemiptera: Reduviidae) in Chuquisaca, Bolivia based on the mitochondrial cytochrome b gene. Mem Inst Oswaldo Cruz, 100(7):753-760
Bolivia	Chuquisaca Department	Andean	Haplotype D	AY702021	Giordano R, Pizarro JC, Paulk S, Stevens L. (2005).Genetic diversity of Triatoma infestans (Hemiptera: Reduviidae) in Chuquisaca, Bolivia based on the mitochondrial cytochrome b gene. Mem Inst Oswaldo Cruz, 100(7):753-760
Bolivia	Chuquisaca Department	Andean	Haplotype E	AY702022	Giordano R, Pizarro JC, Paulk S, Stevens L. (2005).Genetic diversity of Triatoma infestans (Hemiptera: Reduviidae) in Chuquisaca, Bolivia based on the mitochondrial cytochrome b gene. Mem Inst Oswaldo Cruz, 100(7):753-760
Bolivia	Chuquisaca Department	Andean	Haplotype F	AY702023	Giordano R, Pizarro JC, Paulk S, Stevens L. (2005).Genetic diversity of Triatoma infestans (Hemiptera: Reduviidae) in Chuquisaca, Bolivia based on the mitochondrial cytochrome b gene. Mem Inst Oswaldo Cruz, 100(7):753-760
Bolivia	Chuquisaca Department	Andean	Haplotype G	AY702024	Giordano R, Pizarro JC, Paulk S, Stevens L. (2005).Genetic diversity of Triatoma infestans (Hemiptera: Reduviidae) in Chuquisaca, Bolivia based on the mitochondrial cytochrome b gene. Mem Inst Oswaldo Cruz, 100(7):753-760
Bolivia	Tarija Department	Andean	40	GU807596	Sonoda IV, Dias LS, Cueto GM, Cortez MR, Dias JCP, Romanha AJ, Diotaiuti LG. Unpublished.
Bolivia	Various Departments	Andean	CytBHapC	HQ333217	Waleckx E, Salas R, Huaman N, Buitrago R, Bosseno MF, Aliga C. et al. (2011). New insights on the Chagas disease main vector Triatoma infestans (Reduviidae, Triatominae) brought by the genetic analysis of Bolivian sylvatic populations. Infect Genet Evol, 11(5):1045-57.
Bolivia	Various Departments	Andean	CytBHapE	HQ333219	Waleckx E, Salas R, Huaman N, Buitrago R, Bosseno MF, Aliga C. et al. (2011). New insights on the Chagas disease main vector Triatoma infestans (Reduviidae, Triatominae) brought by the genetic analysis of Bolivian sylvatic populations. Infect Genet Evol, 11(5):1045-57.
Bolivia	Santa Cruz Department	Non-Andean	CytBHapU	HQ333235	Quisberth S, Waleckx E, Monje M, Chang B, Noireau F, Breniere SF. (2011). "Andean" and "non-Andean" ITS-2 and mtCytB haplotypes of Triatoma infestans are observed in the Gran Chaco (Bolivia): population genetics and the origin of reinfestation. Infect Genet Evol, 11(5):1006-14.
Bolivia	Various Departments	Andean	CytBHapQ	HQ333230	Waleckx E, Salas R, Huaman N, Buitrago R, Bosseno MF, Aliga C. et al. (2011). New insights on the Chagas disease main vector Triatoma infestans (Reduviidae, Triatominae) brought by the genetic analysis of Bolivian sylvatic populations. Infect Genet Evol, 11(5):1045-57.
Bolivia	Various Departments	Andean	CytBHapJ	HQ333224	Waleckx E, Salas R, Huaman N, Buitrago R, Bosseno MF, Aliga C. et al. (2011). New insights on the Chagas disease main vector Triatoma infestans (Reduviidae, Triatominae) brought by the genetic analysis of Bolivian sylvatic populations. Infect Genet Evol, 11(5):1045-57.
Bolivia	Various Departments	Andean	CytBHapA	HQ333215	Waleckx E, Salas R, Huaman N, Buitrago R, Bosseno MF, Aliga C. et al. (2011). New insights on the Chagas disease main vector Triatoma infestans (Reduviidae, Triatominae) brought by the genetic analysis of Bolivian sylvatic populations. Infect Genet Evol, 11(5):1045-57.
Bolivia	Various Departments	Andean	CytBHapB	HQ333216	Waleckx E, Salas R, Huaman N, Buitrago R, Bosseno MF, Aliga C. et al. (2011). New insights on the Chagas disease main vector Triatoma infestans (Reduviidae, Triatominae) brought by the genetic analysis of Bolivian sylvatic populations. Infect Genet Evol, 11(5):1045-57.
Bolivia	Various Departments	Andean	CytBHapF	HQ333220	Waleckx E, Salas R, Huaman N, Buitrago R, Bosseno MF, Aliga C. et al. (2011). New insights on the Chagas disease main vector Triatoma infestans (Reduviidae, Triatominae) brought by the genetic analysis of Bolivian sylvatic populations. Infect Genet Evol, 11(5):1045-57.
Bolivia	Various Departments	Andean	CytBHapG	HQ333221	Waleckx E, Salas R, Huaman N, Buitrago R, Bosseno MF, Aliga C. et al. (2011). New insights on the Chagas disease main vector Triatoma infestans (Reduviidae, Triatominae) brought by the genetic analysis of Bolivian sylvatic populations. Infect Genet Evol, 11(5):1045-57.
Bolivia	Various Departments	Andean	CytBHapH	HQ333222	Waleckx E, Salas R, Huaman N, Buitrago R, Bosseno MF, Aliga C. et al. (2011). New insights on the Chagas disease main vector Triatoma infestans (Reduviidae, Triatominae) brought by the genetic analysis of Bolivian sylvatic populations. Infect Genet Evol, 11(5):1045-57.
Bolivia	Various Departments	Andean	CytBHapI	HQ333223	Waleckx E, Salas R, Huaman N, Buitrago R, Bosseno MF, Aliga C. et al. (2011). New insights on the Chagas disease main vector Triatoma infestans (Reduviidae, Triatominae) brought by the genetic analysis of Bolivian sylvatic populations. Infect Genet Evol, 11(5):1045-57.
Bolivia	Various Departments	Non-Andean	CytBHapK	HQ333225	Waleckx E, Salas R, Huaman N, Buitrago R, Bosseno MF, Aliga C. et al. (2011). New insights on the Chagas disease main vector Triatoma infestans (Reduviidae, Triatominae) brought by the genetic analysis of Bolivian sylvatic populations. Infect Genet Evol, 11(5):1045-57.
Bolivia	Santa Cruz Department	Non-Andean	CytBHapT	HQ333234	Quisberth S, Waleckx E, Monje M, Chang B, Noireau F, Breniere SF. (2011). "Andean" and "non-Andean" ITS-2 and mtCytB haplotypes of Triatoma infestans are observed in the Gran Chaco (Bolivia): population genetics and the origin of reinfestation. Infect Genet Evol, 11(5):1006-14.
Bolivia	Santa Cruz Department	Non-Andean	CytBHapO	HQ333233	Quisberth S, Waleckx E, Monje M, Chang B, Noireau F, Breniere SF. (2011). "Andean" and "non-Andean" ITS-2 and mtCytB haplotypes of Triatoma infestans are observed in the Gran Chaco (Bolivia): population genetics and the origin of reinfestation. Infect Genet Evol, 11(5):1006-14.
Bolivia	Various Departments	Andean	CytBHapR	HQ333231	Waleckx E, Salas R, Huaman N, Buitrago R, Bosseno MF, Aliga C. et al. (2011). New insights on the Chagas disease main vector Triatoma infestans (Reduviidae, Triatominae) brought by the genetic analysis of Bolivian sylvatic populations. Infect Genet Evol, 11(5):1045-57.
Bolivia	Various Departments	Non-Andean	CytBHapM	HQ333227	Waleckx E, Salas R, Huaman N, Buitrago R, Bosseno MF, Aliga C. et al. (2011). New insights on the Chagas disease main vector Triatoma infestans (Reduviidae, Triatominae) brought by the genetic analysis of Bolivian sylvatic populations. Infect Genet Evol, 11(5):1045-57.
Bolivia	Various Departments	Non-Andean	CytBHapN	HQ333228	Waleckx E, Salas R, Huaman N, Buitrago R, Bosseno MF, Aliga C. et al. (2011). New insights on the Chagas disease main vector Triatoma infestans (Reduviidae, Triatominae) brought by the genetic analysis of Bolivian sylvatic populations. Infect Genet Evol, 11(5):1045-57.
Bolivia	Various Departments	Andean	CytBHapL	HQ333226	Waleckx E, Salas R, Huaman N, Buitrago R, Bosseno MF, Aliga C. et al. (2011). New insights on the Chagas disease main vector Triatoma infestans (Reduviidae, Triatominae) brought by the genetic analysis of Bolivian sylvatic populations. Infect Genet Evol, 11(5):1045-57.
Bolivia	Various Departments	Non-Andean	CytBHapP	HQ333229	Waleckx E, Salas R, Huaman N, Buitrago R, Bosseno MF, Aliga C. et al. (2011). New insights on the Chagas disease main vector Triatoma infestans (Reduviidae, Triatominae) brought by the genetic analysis of Bolivian sylvatic populations. Infect Genet Evol, 11(5):1045-57.
Bolivia	Various Departments	Andean/Non-Andean	CytBHapD	HQ333218	Waleckx E, Salas R, Huaman N, Buitrago R, Bosseno MF, Aliga C. et al. (2011). New insights on the Chagas disease main vector Triatoma infestans (Reduviidae, Triatominae) brought by the genetic analysis of Bolivian sylvatic populations. Infect Genet Evol, 11(5):1045-57.
Bolivia	Santa Cruz Department	Non-Andean	CytBHapV	HQ333236	Quisberth S, Waleckx E, Monje M, Chang B, Noireau F, Breniere SF. (2011). "Andean" and "non-Andean" ITS-2 and mtCytB haplotypes of Triatoma infestans are observed in the Gran Chaco (Bolivia): population genetics and the origin of reinfestation. Infect Genet Evol, 11(5):1006-14.
Bolivia	Santa Cruz Department	Non-Andean	CytBHapW	HQ333237	Quisberth S, Waleckx E, Monje M, Chang B, Noireau F, Breniere SF. (2011). "Andean" and "non-Andean" ITS-2 and mtCytB haplotypes of Triatoma infestans are observed in the Gran Chaco (Bolivia): population genetics and the origin of reinfestation. Infect Genet Evol, 11(5):1006-14.
Bolivia	Santa Cruz Department	Non-Andean	CytBHapX	HQ333238	Quisberth S, Waleckx E, Monje M, Chang B, Noireau F, Breniere SF. (2011). "Andean" and "non-Andean" ITS-2 and mtCytB haplotypes of Triatoma infestans are observed in the Gran Chaco (Bolivia): population genetics and the origin of reinfestation. Infect Genet Evol, 11(5):1006-14.
Bolivia	Santa Cruz Department	Non-Andean	CytBHapY	HQ333239	Quisberth S, Waleckx E, Monje M, Chang B, Noireau F, Breniere SF. (2011). "Andean" and "non-Andean" ITS-2 and mtCytB haplotypes of Triatoma infestans are observed in the Gran Chaco (Bolivia): population genetics and the origin of reinfestation. Infect Genet Evol, 11(5):1006-14.
Bolivia	Various Departments	Non-Andean	CytBHapS	HQ333232	Waleckx E, Salas R, Huaman N, Buitrago R, Bosseno MF, Aliga C. et al. (2011). New insights on the Chagas disease main vector Triatoma infestans (Reduviidae, Triatominae) brought by the genetic analysis of Bolivian sylvatic populations. Infect Genet Evol, 11(5):1045-57.
Paraguay	Boquerón/Presidente Hayes Department	Non-Andean	Haplo a/12J-14	KY654077	This study
Paraguay	Boquerón/Presidente Hayes Department	Andean/Non-Andean	Haplo b/12J-57	KY654076	This study
Paraguay	Boquerón/Presidente Hayes Department	Non-Andean	Haplo c/CA-397	KY654080	This study
Paraguay	Boquerón/Presidente Hayes Department	Non-Andean	Haplo d/12Jre-872	KY654078	This study
ND: not described
